# Supplementary material for: The p–n transformation and thermoelectric property optimization of Cu1+xFeSe2 (x = 0–0.05) alloys
Source: Royal Society of Chemistry journal article supplement (doi:10.1039/c9tc01607d), 2019-01-01
Supplement: c9tc01607d1.pdf [file c9tc01607d1.pdf]

# Electronic Supporting Information

## The p-n transformation and thermoelectric property optimization for $\text{Cu}_{1+x}\text{FeSe}_2$ ( $x=0-0.05$ ) alloys

Jinze Zhai, Hongchao Wang, Wenbin Su, Teng Wang, Fahad Mehmood,  
Xue Wang, Tingting Chen, Taichang Huo, Kaiqi Zhang, Chunlei Wang

School of Physics, State Key Laboratory of Crystal Materials, Shandong  
University, Jinan 250100, P. R. China

\*E-mail: [wanghc@sdu.edu.cn](mailto:wanghc@sdu.edu.cn) (H. Wang),

E-mail: [wangcl@sdu.edu.cn](mailto:wangcl@sdu.edu.cn) (C. Wang)

**Table S1.** The theoretical, experimental and relative densities for all  $\text{Cu}_{1+x}\text{FeSe}_2$  samples.

| <b>x</b>                    | <b>0.00</b>  | <b>0.01</b>  | <b>0.02</b>  | <b>0.03</b>  | <b>0.05</b>  |
|-----------------------------|--------------|--------------|--------------|--------------|--------------|
| <b>Theoretical density</b>  | <b>5.544</b> | <b>5.545</b> | <b>5.562</b> | <b>5.548</b> | <b>5.553</b> |
| <b>Experimental density</b> | <b>5.413</b> | <b>5.195</b> | <b>5.159</b> | <b>5.212</b> | <b>5.060</b> |
| <b>Relative density</b>     | <b>98%</b>   | <b>94%</b>   | <b>93%</b>   | <b>93%</b>   | <b>91%</b>   |

**Table S2.** The Goldsmid-Sharp band gaps for all  $\text{Cu}_{1+x}\text{FeSe}_2$  samples.

| <b>x</b>                              | <b>0.00</b> | <b>0.01</b> | <b>0.02</b> | <b>0.03</b> | <b>0.05</b> |
|---------------------------------------|-------------|-------------|-------------|-------------|-------------|
| <b><math>E_{GS}(\text{eV})</math></b> | <b>0.17</b> | <b>0.17</b> | <b>0.18</b> | <b>0.19</b> | <b>0.16</b> |

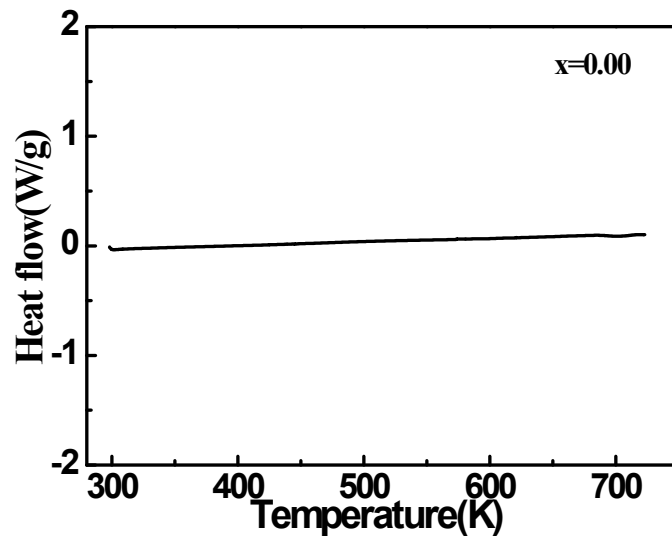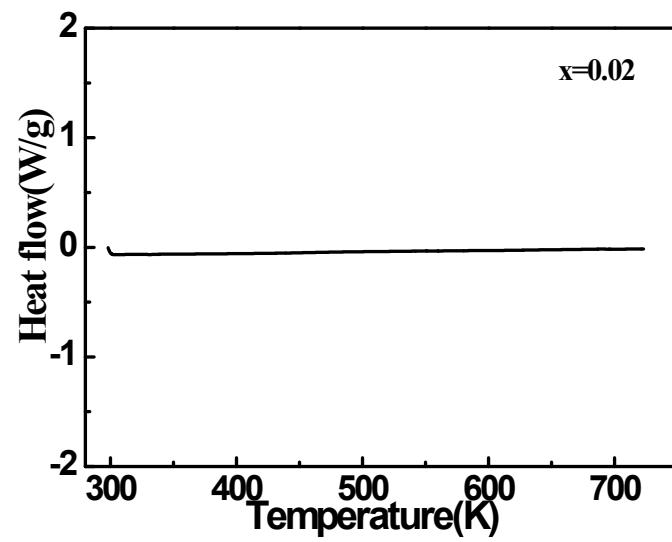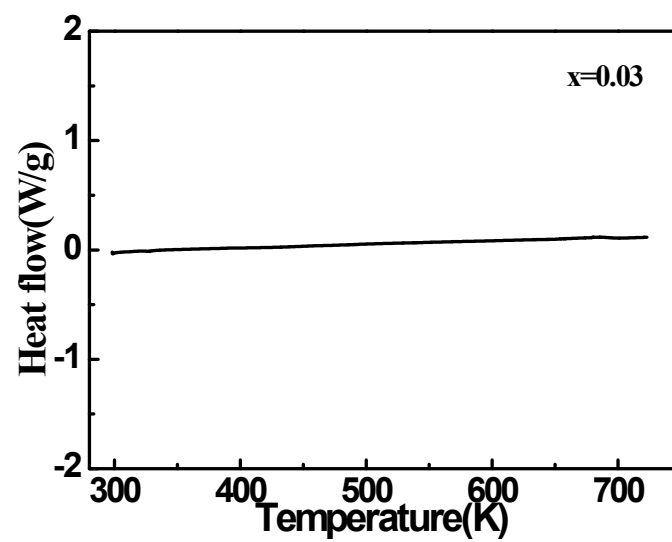

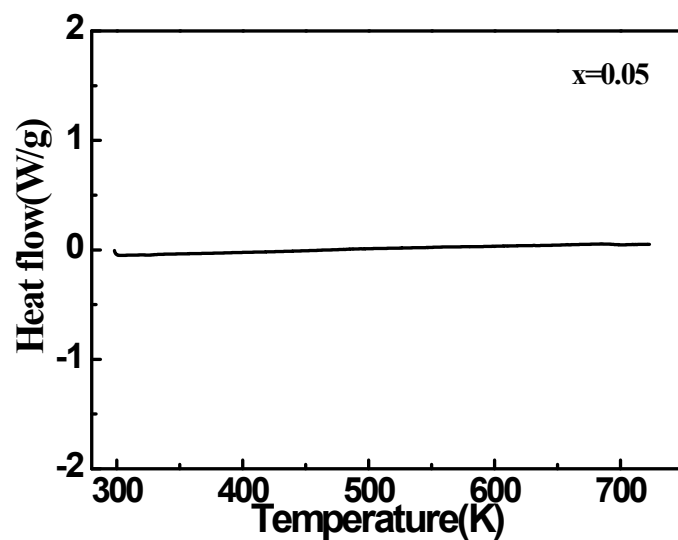

**Figure S1.** DSC data of  $\text{Cu}_{1-x}\text{FeSe}_2$  ( $x=0.00, 0.02, 0.03$  and  $0.05$ ) in temperature range of 300K-723K under  $\text{N}_2$  atmosphere.
